# Supplementary material for: Analysis of the Presence and Levels of IgG Antibodies Directed against the S1 Protein Receptor Binding Domain and the N Protein of SARS-CoV-2 in Patients with Multiple Sclerosis Treated with Immunomodulatory Therapies
Source: MDPI journal article supplement (doi:10.3390/vaccines12030255), 2024-02-29
Supplement: s1 [file s1]

## Supplementary materials

**Table S1.** IgG-S1RBD and IgG-N levels according to particular DMTs.

|                  |                                            |                          | VISIT I <sup>1</sup>            | VISIT II <sup>1</sup>          |
|------------------|--------------------------------------------|--------------------------|---------------------------------|--------------------------------|
| INF <sup>2</sup> | Wholegroup<br>n=14                         | IgG-S1(RBD) <sup>5</sup> | 4645,7<br>(197,8; 16898)        | 4878,5<br>(1061,42; 15088,35)  |
|                  |                                            | IgG-N <sup>6</sup>       | 0,23<br>(0,0325; 0,88)          | 1,035<br>(0,31; 3,64)          |
|                  | Vaccinated<br>visit 1 n=7<br>visit 2 n= 9  | IgG-S1(RBD)              | 16898<br>(10560,05 ;24896,85)   | 15264,3<br>(6997,3; 80000)     |
|                  |                                            | IgG-N                    | 0,05<br>(0,045; 1,85)           | 1,54<br>(1,37; 8,38)           |
|                  | Unvaccinated<br>visit 1 n=7<br>visit 2 n=5 | IgG-S1(RBD)              | 197,8<br>(0,8; 728,5)           | 1919,5<br>(79,3; 5581,5)       |
|                  |                                            | IgG-N                    | 0,15<br>(0,08; 0,83)            | 0,75<br>(0,675; 0,78)          |
| GA <sup>3</sup>  | Wholegroup<br>n=10                         | IgG-S1(RBD)              | 8708,55<br>(1489,925;16946,325) | 4659,35<br>(983,425; 13982,25) |
|                  |                                            | IgG-N                    | 0,365<br>(0,04; 1,16)           | 1,265<br>(0,2575; 4,03)        |
|                  | Vaccinated<br>n=8                          | IgG-S1(RBD)              | 12351,55<br>(5966,4; 24059,68)  | 7428,3<br>(1073,475; 15030,8)  |
|                  |                                            | IgG-N                    | 0,215<br>(0,0375; 0,84)         | 1,625<br>(0,4525; 5,63)        |
|                  | Unvaccinated<br>n=2                        | IgG-S1(RBD)              | 438<br>4645,7                   | 6709,6<br>359                  |
|                  |                                            | IgG-N                    | 0,35<br>1,87                    | 1,48<br>0,16                   |
|                  | Wholegroup<br>n=14                         | IgG-S1(RBD)              | 3013,8<br>(12,1; 18568,7)       | 3886,9<br>(1162,2; 4165,2)     |
|                  |                                            | IgG-N                    | 0,22<br>(0,033; 0,522)          | 0,75<br>(0,29; 1,99)           |

|                                              |             |                               |                              |
|----------------------------------------------|-------------|-------------------------------|------------------------------|
| Vaccinated<br>(visit 1 n=8<br>Visit 2 n=10)  | IgG-S1(RBD) | 14328,25<br>(5684,7;21981,85) | 3954,4<br>(1358,25; 6942,93) |
|                                              | IgG-N       | 0,44<br>(0,19; 0,61)          | 0,76<br>(0,22; 1,95)         |
| Unvaccinated<br>(Visit 1 n=6<br>Visit 2 n=4) | IgG-S1(RBD) | 55,8<br>(11,73; 220,25)       | 1148,4<br>(735,65; 2048,175) |
|                                              | IgG-N       | 0,04<br>( 0,015; 0,16)        | 0,39<br>(0,29; 1,64)         |

<sup>1</sup> Data in table are presented as Median (Q1; Q3); <sup>2</sup>Interfero <sup>3</sup> Glatiramer acetale; <sup>4</sup> Dimethyl fumarte;  
<sup>5</sup>Antibodies IgG against S1protein binding receptor domain;<sup>6</sup>AntibodiesIgGagainst N protein.
